1  
2  
3  
4  
5  
6  
7  
8  
9  
10  
11  
12  
13  
14  
15  
16  
17  
18  
19  
20  
21  
22  
23  
24  
25  
26  
27  
28

**The commercial antimicrobial triclosan induces high levels of antibiotic tolerance *in vitro* and reduces antibiotic efficacy up to 100-fold *in vivo***

Corey Westfall<sup>1,2</sup>, Ana Lidia Flores-Mireles<sup>1,3,5</sup>, John Isaac Robinson<sup>4</sup>, Aaron J.L. Lynch<sup>3</sup>, Scott Hultgren<sup>3</sup>, Jeffrey P. Henderson<sup>4</sup>, & Petra Anne Levin<sup>2,6</sup>,

<sup>2</sup>Department of Biology, Washington University in St. Louis, St. Louis, MO 63130, USA

<sup>3</sup>Department of Molecular Microbiology and Microbial Pathogenesis, Washington University School of Medicine, St. Louis, MO 63110, USA

<sup>4</sup>Division of Infectious Diseases, John T. Milliken Department of Internal Medicine, Washington University School of Medicine, St. Louis, MO 63110, USA

<sup>5</sup>Department of Biological Sciences, University of Notre Dame, Notre Dame, Indiana, USA.

<sup>1</sup>These two authors contributed equally to this study

<sup>6</sup>To whom correspondence should be addressed: [plevin@wustl.edu](mailto:plevin@wustl.edu)

29 **Abstract**

30 The antimicrobial triclosan is used in a wide range of consumer products ranging from  
31 toothpaste, cleansers, socks, and baby toys. A bacteriostatic inhibitor of fatty acid synthesis,  
32 triclosan is extremely stable and accumulates in the environment. Approximately 75% of adults  
33 in the US have detectable levels of the compound in their urine, with a sizeable fraction of  
34 individuals (>10%) having urine concentrations equal to or greater than the minimal inhibitory  
35 concentration for *Escherichia coli* and methicillin-resistant *Staphylococcus aureus* (MRSA).  
36 Previous work has identified connections between defects in fatty acid synthesis and  
37 accumulation of the alarmone guanosine tetraphosphate (ppGpp), which has been repeatedly  
38 associated with antibiotic tolerance and persistence. Based on these data, we hypothesized that  
39 triclosan exposure may inadvertently drive bacteria into a state in which they are able to tolerate  
40 normally lethal concentrations of antibiotics. Here we report that clinically relevant  
41 concentrations of triclosan increased *E. coli* and MRSA tolerance to bactericidal antibiotics as  
42 much as 10,000 fold *in vitro* and reduced antibiotic efficacy up to 100-fold in a mouse urinary  
43 tract infection model. Genetic analysis indicated that triclosan-mediated antibiotic tolerance  
44 requires ppGpp synthesis, but is independent of growth. These data highlight an unexpected and  
45 certainly unintended consequence of adding high concentrations of antimicrobials in consumer  
46 products, supporting an urgent need to reevaluate the costs and benefits of the prophylactic use  
47 of triclosan and other bacteriostatic compounds.

48

49 **Importance**

50 Added as a prophylactic to a wide range of consumer products, the fatty acid synthesis inhibitor  
51 triclosan accumulates to high levels in humans and the environment. Based on links between  
52 defects in fatty acid synthesis and accumulation of the alarmone ppGpp, we hypothesized that

53 triclosan would render cells tolerant to bactericidal compounds due to ppGpp-mediated  
54 inhibition of biosynthetic capacity. Our data indicate that clinically relevant concentrations of  
55 triclosan induces higher tolerance of *E. coli* and methicillin resistant *S. aureus* (MRSA) to a  
56 panel of bactericidal antibiotics up to 10,000-fold. In a urinary tract infection model, mice  
57 exposed to triclosan exhibited bacterial loads ~100-fold higher in the bladder than control  
58 animals following ciprofloxacin challenge. These findings highlight an unexpected consequence  
59 of antimicrobials in consumer products and support an urgent need to reevaluate the costs and  
60 benefits of the prophylactic use of triclosan and other bacteriostatic compounds.

61

## 62 **Introduction**

63 The prophylactic use of antibiotics in consumer goods, ranging from animal feed to personal care  
64 products, is widely believed to be a major contributor to the epidemic increase in antibiotic-  
65 resistant pathogens (1-3). Prominent among these prophylactics are triclosan and triclocarban,  
66 polychlorinated aromatic antimicrobials targeting fatty acid synthesis. Triclosan in particular is  
67 found in a wide variety of consumer products, including: toothpaste, cleansers, socks, and baby  
68 toys (1). Although the US Food and Drug Administration effectively banned the use of triclosan  
69 in household soap in 2017, as of this writing Canada and Australia, among other countries, have  
70 not elected to take similar action.

71

72 An inhibitor of enoyl-acyl carrier protein reductase, (4), at low concentrations (200 ng/ml)  
73 triclosan is bacteriostatic, preventing cell growth but having little effect on viability over the  
74 short term. At high concentrations (>10 µg/ml), triclosan is bactericidal, most likely killing cells  
75 through disruption of plasma membrane integrity (4). Recent work from the Waters lab suggests  
76 that at these higher concentrations triclosan can serve as an adjuvant, acting synergistically with

77 tobramycin and other drugs, increasing killing by ~100-fold in a *Pseudomonas aeruginosa*  
78 biofilm model for CF lung infections (5). Triclosan is typically used as an antimicrobial additive  
79 at these higher, bactericidal concentrations.

80

81 Because of its widespread use as a prophylactic, the high concentrations at which it is employed,  
82 and its inherent stability, triclosan accumulates to high levels in the environment (6, 7).

83 Approximately 75% of adults in the US have detectable levels of the compound in their urine,  
84 and >10% have urine concentrations greater than or equal to the minimal inhibitory  
85 concentration for *Escherichia coli* (200 ng/mL) and methicillin-resistant *Staphylococcus aureus*  
86 (MRSA) (100 ng/mL) (8, 9).

87

88 While the inverse relationship between antibiotic use and antibiotic efficacy is largely  
89 attributable to the selection of heritable traits, non-heritable traits such as antibiotic tolerance and  
90 persistence are also likely to be involved (10). In contrast to genetically-resistant bacteria, which  
91 grow in the presence of an antibiotic, tolerant bacteria are able to survive antibiotic challenge for  
92 longer periods of time than their more sensitive counterparts (10). Persister cells are the small  
93 sub-set of an otherwise-sensitive population ( $\sim 1$  in  $10^6$ ) that exhibit levels of tolerance sufficient  
94 to protect them from otherwise lethal concentrations of antimicrobial compounds (11). Increases  
95 in antibiotic tolerance and persistence are confounding factors in the treatment of chronic *P.*  
96 *aeruginosa* (12) and *S. aureus* (13) infections and are thought to contribute to the refractory  
97 nature of medically relevant biofilms (14). Reduced growth rate and metabolic activity is  
98 associated with increased antibiotic tolerance (10) and is a defining trait of persister cells.

99

100 Based on previous work identifying connections between defects in fatty acid synthesis and  
101 accumulation of the alarmone guanosine tetraphosphate (ppGpp) (15), and the possible link  
102 between ppGpp and antibiotic tolerance (16), we hypothesized that triclosan exposure may  
103 inadvertently drive bacteria into a metabolically depressed state in which they are able to tolerate  
104 normally lethal concentrations of antibiotics (17, 18). In particular, inhibiting fatty acid  
105 synthesis stimulates interaction between acyl carrier protein and the hydrolase domain of the  
106 bifunctional ppGpp synthase SpoT, resulting in accumulation of the alarmone and the  
107 concomitant inhibition of biosynthetic capacity (19).

108

109 Here we report that clinically-relevant bacteriostatic concentrations of triclosan increased *E. coli*  
110 and methicillin resistant *Staphylococcus aureus* (MRSA) tolerance to bactericidal antibiotics as  
111 much as 10,000-fold *in vitro* and reduced antibiotic efficacy ~100-fold in a mouse urinary tract  
112 infection model. Triclosan-mediated antibiotic tolerance is dependent on ppGpp synthesis:  
113 although triclosan inhibited the growth of both wild-type and ppGpp mutant cells, only the latter  
114 were highly susceptible to challenge with bactericidal compounds. In contrast, pretreatment with  
115 another bacteriostatic drug, spectinomycin, a translation inhibitor that does not impact ppGpp  
116 accumulation (20), induced high levels of antibiotic tolerance in both wild-type and ppGpp  
117 mutant cells. Together, these data highlight an unexpected and certainly unintended  
118 consequence of employing triclosan as a commercial antimicrobial, and support an urgent need  
119 to reevaluate the costs and benefits of the addition of triclosan, and potentially other  
120 bacteriostatic compounds, to consumer products.

121

122

123 **Results**

124 **Triclosan pretreatment results in high levels of tolerance to bactericidal antibiotics *in vitro***

125 To assess if physiologically relevant levels of triclosan are sufficient to promote tolerance to  
126 bactericidal antibiotics, we examined the relative sensitivity of *E. coli* (MG1655) and *S. aureus*  
127 (FPR3757 an USA-300 MRSA strain) cultured in minimal inhibitory concentrations (MIC) of  
128 triclosan to a panel of bactericidal antibiotics. Triclosan MICs for *E. coli* and MRSA were 200  
129 ng/mL and 100 ng/mL, respectively under our growth conditions; similar to the triclosan  
130 concentration found in the urine from individuals using triclosan-containing products (8, 9). In  
131 all cases, triclosan was added 30 minutes prior to the addition of the specified bactericidal  
132 antibiotic and both antibiotics were maintained in the culture for the remainder of the  
133 experiment.

134  
135 Triclosan had a dramatic protective effect on *E. coli* in an end point assay, increasing survival by  
136 several orders of magnitude in the presence of three bactericidal antibiotics and providing nearly  
137 complete protection against a fourth (Fig. 1). *E. coli* treated with triclosan exhibited a 1,000-fold  
138 increase in survival in the presence of 50 µg/mL (~5x MIC) kanamycin, an inhibitor of peptide  
139 bond formation. It also showed a 10,000-fold increase in survival in the presence of streptomycin  
140 (50 µg /mL: ~2x MIC), an inhibitor of tRNA-ribosome interaction, and ciprofloxacin (100  
141 ng/mL: ~3x MIC) a gyrase inhibitor (Fig. 1). Strikingly, triclosan rendered *E. coli* almost  
142 completely refractory to treatment with the cell wall active antibiotic ampicillin (100 µg /mL;  
143 ~10x MIC). Viable cell numbers were essentially identical in triclosan and triclosan-ampicillin  
144 treated cultures at 2 hours, and 10% of cells in triclosan-ampicillin cultures were viable at 20  
145 hours, suggesting triclosan increased persister frequency to all tested antibiotics.

146 Triclosan also protected MRSA cells from high concentrations of the glycopeptide antibiotic,  
147 vancomycin, over the course of a 20-hour experiment (Fig. 2c). MRSA treated with 100 ng/ml of  
148 triclosan were essentially refractory to 50 ng/ml vancomycin (10x the MIC) at 4 hours and  
149 exhibited a viable cell count 200x that of untreated cells at 8 hours. Even at 20 hours the viable  
150 cell count was several times higher in the presence of both triclosan and vancomycin than  
151 vancomycin alone. This delayed reduction in viable cell count is consistent with induction of a  
152 persistent state (10).

153

#### 154 **Triclosan increases persister cell frequency**

155 To further assess the protective effect of triclosan, we next performed kinetic kill curves, in  
156 which we measured colony-forming units (CFU) over a 20-hour time frame. If persister cells are  
157 present, we expect to observe two slopes, one corresponding to the kill rate of the general  
158 population and the second slope corresponding to the slower kill rate of persister cells (10). In  
159 this manner, the kill curve is able to separate antibiotic tolerance at the population level from the  
160 impact of triclosan treatment on persister levels.

161

162 For these experiments, we focused on ciprofloxacin, the broad-spectrum antibiotic used to treat  
163 urinary tract infections (UTIs). Consistent with the results of the end point assay (Fig. 1),  
164 triclosan substantially protected *E. coli* from ciprofloxacin-induced cell death throughout the  
165 duration of the time course (Fig. 2a, b). Protection was particularly pronounced at the 2-hour  
166 time point, where the slope of the kill curve for pre-treated cells diverged substantially from that  
167 of untreated cells (Fig. 2a). A reduced kill rate suggests that the pre-treated population contains a  
168 larger proportion of persister cells (21).

169 In agreement with previous work (16), persister population size was proportional to the  
170 concentration of ciprofloxacin. 10% of triclosan treated MG1655 cells cultured in 100 ng/mL  
171 ciprofloxacin remained viable after 2 hours (Fig. 2a), while only 0.1% cultured in the more  
172 clinically-relevant 1,000 ng/mL ciprofloxacin were viable at the same time point (Fig. 2b). For  
173 perspective, 0.1% is 1,000-fold higher than the expected frequency of persisters in an untreated  
174 population (10). After 20 hours, 90,000 CFU/mL were viable in cultures treated with both  
175 triclosan and 100 ng/mL ciprofloxacin (Fig. 2a), compared to 20 cells/mL in cultures treated with  
176 ciprofloxacin alone. At 1,000 ng/mL ciprofloxacin, cultures treated with both triclosan and  
177 ciprofloxacin contained 30 viable cells per mL (Fig. 2b). In contrast, no viable cells were  
178 detected (<10 cells/mL) in cultures treated with 1,000 ng/mL ciprofloxacin alone. We observed  
179 an increase in the abundance of persisters at drug concentrations above 1,000 ng/mL (Fig S1)  
180 (16). Although this finding initially appeared counterintuitive, it is consistent with previous  
181 reports suggesting that prophage induction in response to DNA damage is responsible for cell  
182 death at lower concentrations of ciprofloxacin, while higher concentrations kill cells before  
183 prophage are induced (16).

184

### 185 **Triclosan-mediated tolerance requires ppGpp**

186 Based on the well-established connection between defects in fatty acid synthesis and  
187 accumulation of ppGpp, we speculated that triclosan-mediated tolerance was dependent on the  
188 synthesis of the alarmone (15). To test this idea, we compared the relative viability of wild-type  
189 *E. coli* and mutants unable to synthesize the alarmone (ppGpp0; *spoT::cat ΔrelA*) 2 hours after  
190 antibiotic challenge in the presence or absence of triclosan.

191



192 Although triclosan inhibited the growth of both wild-type and ppGpp0 cells, it was unable to  
193 substantially protect ppGpp0 cells from any of the four bactericidal antibiotics we tested. These  
194 include ampicillin and ciprofloxacin, as well as the translation inhibitors, kanamycin and  
195 streptomycin (Fig. 3a, b). The ppGpp0 cells were more sensitive to kanamycin and streptomycin,  
196 showing no viable cells after 60-minute treatment, thus measurements were performed at 30  
197 minutes. Importantly, triclosan alone was not bactericidal to either wild-type or ppGpp0 cells  
198 (Fig. S2).

199  
200 In contrast to triclosan, pre-treatment with another bacteriostatic compound, spectinomycin,  
201 increased tolerance to kanamycin, streptomycin, ampicillin, and ciprofloxacin in both wild-type  
202 and ppGpp0 mutant cells (Fig. 3C). A translation inhibitor, spectinomycin does not impact  
203 ppGpp levels in *E. coli* (20). While spectinomycin was still protective in the ppGpp0 cells, levels  
204 of protection were slightly decreased compared to WT cells.

205

### 206 **Triclosan drives tolerance to ciprofloxacin in a murine model**

207 Due to its widespread use and inherent stability, triclosan is present in both human populations  
208 and the environment (8). Thus, a key question is whether the tolerance we observed *in vitro* is  
209 relevant *in vivo*. To determine the physiological relevance of triclosan-mediated tolerance, we  
210 employed a mouse model of *E. coli* UTI. UTIs are one of the most prevalent bacterial infections,  
211 impacting approximately 150 million people annually (22). Uropathogenic *E. coli* (UPEC) is the  
212 main causative agent of both uncomplicated and complicated UTI (23). Pretreatment with  
213 triclosan rendered the well-characterized *E. coli* cystitis isolate UTI89 ~10-fold more tolerant to

214 1,000 ng/mL ciprofloxacin than untreated cells at 2 hours, a level equivalent to the tolerance we  
215 observed for *E. coli* MG1655 at the same time point (Fig. 1 and Fig. S3).

216

217 For *in vivo* experiments, we provided six-week old female wild-type C3H/HeN mice with  
218 drinking water containing 1,000 ng/mL triclosan for 21 days. Control mice were given plain  
219 water for the same duration. At 21 days, experimental and control mice were trans-urethrally  
220 infected with  $\sim 5 \times 10^7$  CFU of *E. coli* UTI89. At 24 hours post-infection, a subset of the mice was  
221 treated with intraperitoneal ciprofloxacin (25 mg/kg). At 48 hours post-infection, all mice were  
222 sacrificed and bacterial colonization assessed in urine and bladder.

223

224 After ciprofloxacin treatment, bacterial titers were >100-fold higher in the urine ( $p < 0.0001$ ) and  
225 >10-fold higher ( $p < 0.0001$ ) in the bladders of triclosan-treated mice versus control animals (Fig.  
226 4a, b), consistent with triclosan-induced tolerance occurring *in vivo*. Bacterial load at 24 hours  
227 post-infection was nearly equivalent in triclosan-treated and control mice, indicating that  
228 triclosan did not significantly impair UTI89 viability (Fig. 4a, b). Treated mice had triclosan  
229 levels between 70-750 ng/mL in their urine, comparable to the MIC for *E. coli* (200 ng/mL) and  
230 similar to reported triclosan levels in human urine (2.4 to 3,790 ng/mL) (8) (Fig. 4c). We also  
231 detected two putative metabolized forms of triclosan, one with a mass consistent with the  
232 previously reported sulfonated triclosan (24), and the other 96 daltons larger (Fig. S4). Whether  
233 or not the modified forms of the drug are active against bacteria is unclear. Control mice had no  
234 observable triclosan (below 1.6 ng/mL limit of detection).

235

236

237 **Discussion**

238 Our data indicate that environmentally relevant concentrations of triclosan reduce antibiotic  
239 efficacy as much a 100-fold *in vivo* (Fig. 4) and highlight an unexpected and potentially  
240 important role for triclosan as a contributor to antibiotic tolerance and bacterial persistence in  
241 both community and healthcare settings. Triclosan-mediated tolerance is dependent on ppGpp  
242 synthesis, most likely in response to inhibition of fatty acid synthesis (Fig. 3a) (15). This finding  
243 is consistent with prior work implicating ppGpp in antibiotic tolerance and persister development  
244 (16).

245  
246 In contrast to previous studies of ppGpp-induced persistence that relied on either carbon  
247 starvation or the addition of serine hydroxamate to induce accumulation of high concentrations  
248 of ppGpp (100x above baseline) (25, 26), defects in fatty acid synthesis have at best a modest  
249 impact on ppGpp levels (~5x over baseline) (15). This suggests that even relatively low levels of  
250 ppGpp are sufficient to protect cells from a panel of antimicrobials. Specifically how modest  
251 increases in ppGpp might confer tolerance to different antibiotics thus remains an open question.

252  
253 We favor the hypothesis that ppGpp mediates changes in individual biosynthetic pathways that  
254 render them tolerant of their cognate antimicrobial. For example, ppGpp-dependent down-  
255 regulation of ribosomal RNA synthesis significantly curtails translation (27), potentially  
256 conferring tolerance to the translational inhibitors kanamycin and streptomycin. Similarly,  
257 increases in ppGpp are reported to curtail DNA replication (28)—both elongation and  
258 initiation—providing a straightforward explanation for ppGpp-mediated ciprofloxacin resistance.

259

260 It is generally recognized as poor practice to prescribe a bacteriostatic compound prior to or  
261 along with delivery of a bactericidal one (29), because of the potential that the former will  
262 interfere with the activity of the latter. At the same time, their mechanisms of action, and  
263 therefore the mechanisms by which these drugs drive tolerance, are likely to differ widely. While  
264 the translation inhibitor spectinomycin provides protection against bactericidal compounds, it  
265 does not induce accumulation of ppGpp (20), a fact supported by our finding that spectinomycin  
266 induces tolerance to bactericidal compounds in both wild-type and ppGpp0 cells (Fig. 3c). At the  
267 same time, ppGpp-dependent induction of antibiotic tolerance is likely to be a feature triclosan  
268 shares with a related compound, triclocarban, which also inhibits an early step in fatty acid  
269 synthesis, and is also a common additive in consumer products. Triclosan also stands out from  
270 other bacteriostatic compounds by virtue of its widespread use and sheer abundance in the  
271 environment. ~1 kg of Triclosan is produced for every 3 kg of other antimicrobials and estimates  
272 indicate that ~100 metric tonnes are being deposited annually in the environment through waste  
273 water treatment in the US alone (30).

274

275 Although triclosan has low toxicity (LD-50 4,350 mg/kg orally) (31), accumulating data link  
276 long-term exposure with antibiotic resistance (32) and there are reports that triclosan may also  
277 function as an endocrine disrupter (33, 34). Our analysis of the impact of triclosan on antibiotic  
278 efficacy in a mouse UTI model (Fig. 4) highlights yet another deleterious “side effect” of this  
279 ubiquitous antimicrobial. UTIs alone impact 150 million people worldwide (22) at a cost of \$3.5  
280 billion per year in the US alone (35). Complications associated with UTIs include pyelonephritis  
281 with sepsis, renal damage, pre-term birth, *Clostridium difficile* colitis, sepsis, and death  
282 particularly in the very old and the very young (23). Coupled with the well established

283 connection between antibiotic tolerance and recurrent/chronic infections (12, 13), our findings  
284 reinforce the need for substantial caution—as well as consideration of unintended  
285 consequences—in evaluating the costs and benefits of antimicrobial additives in consumer  
286 products.

287

## 288 **Methods**

### 289 **Materials and Strains**

290 Triclosan, ampicillin, kanamycin, streptomycin, ciprofloxacin, and vancomycin were purchased  
291 from Sigma-Aldrich. Stock solutions were made in water for ampicillin (100 mg/mL),  
292 kanamycin (50 mg/mL), streptomycin (100 mg/mL) and ciprofloxacin (10 mg/mL). Triclosan  
293 was dissolved in ethanol (10 mg/mL), and vancomycin was dissolved in DMSO (100 mg/mL). *E.*  
294 *coli* MG1655 and *S. aureus* FPR3575 were both lab strains and *E. coli* UTI89 was isolated from  
295 a patient with a urinary tract infection (36). *E. coli* were grown in Luria-Bertani broth (LB) and  
296 *S. aureus* was grown in tryptic soy broth (TSB). Growth temperature was 37 °C for all  
297 experiments.

298

### 299 **Determination of Minimum Inhibitory Concentration (MIC)**

300 To determine the MIC for the panel of antibiotics utilized in this study, *E. coli* and *S. aureus*  
301 were grown to OD<sub>600</sub> = 0.1 in LB or TSB, respectively. Cells were then back-diluted 1,000-  
302 fold and transferred to a 96-well plate containing 2-fold dilutions of respective antibiotics and  
303 cultured at 37 °C for 16 additional hours with vigorous shaking in a BioTek Eon plate reader.  
304 MIC was calculated as the lowest antibiotic concentration, preventing development of detectable  
305 turbidity at OD<sub>600</sub>.

306 **Assays for antibiotic tolerance and persistence**

307 To assay tolerance and persistence, *E. coli* and *S. aureus* were grown to an OD-600 = 0.2 in LB  
308 or TSB, respectively. Cells were then back-diluted to an OD-600 = 0.1 in media containing  
309 triclosan at indicated concentrations and cultured for an additional 30 minutes, before being  
310 challenged with bactericidal antibiotics. For dot plating, 10  $\mu$ L of a 10-fold dilution series was  
311 plated on antibiotic-free LB agar or TSB agar as appropriate. For determination of colony  
312 forming units (CFU), 100  $\mu$ L of a 10-fold dilution series was spread on antibiotic-free LB agar or  
313 TSB agar plates. Cells were incubated for ~12 hours at 37 °C prior to quantification. CFUs were  
314 normalized to CFUs at the initial time point to correct for the ~2-fold increase in cell number in  
315 untreated cultures during the 30-minute pre-treatment period. Relative persistence is defined as  
316 the CFU's of the triclosan treated sample divided by the CFU's of the non-treated sample.

317

318 **UTI mouse work**

319 Six-week old female wild-type C3H/HeN mice were obtained from Envigo. Mice were treated  
320 with or without 1,000 ng/mL (100 ppm) triclosan in the drinking water for 21 days. At 21 days,  
321 mice were anesthetized by inhalation of 4% isoflurane and mouse bladders were trans-urethrally  
322 infected with approximately  $5 \times 10^7$  CFU of *E. coli* UTI89 in 50 $\mu$ l PBS(37). Briefly, a single  
323 UTI89 colony was inoculated in 20 ml of Luria Broth (LB) and incubated at 37 °C under static  
324 conditions for 24 hours. Bacteria were then diluted (1:1,000) into fresh LB and incubated at 37  
325 °C under static conditions for 18 to 24 hours. Bacteria were subsequently washed three times  
326 with PBS and then concentrated to approximately  $5 \times 10^7$  CFU per 50  $\mu$ L. At 24 hours post-  
327 infection, mice received 25mg/kg of ciprofloxacin intraperitoneal. 48 hours post-infection, mice  
328 were euthanized, and bladders were harvested and urine was collected. Bladders were

329 homogenized in PBS and bacterial load present in bladders and urines was determined by plating  
330 serial dilutions on LB agar supplemented with antibiotics when appropriate. Statistical analyses  
331 were performed using the Mann–Whitney U test with GraphPad Prism software (version 6.0 for  
332 Mac). All animal studies were performed in accordance with the guidelines of the Committee for  
333 Animal Studies at Washington University School of Medicine.

334

### 335 **Measurement of triclosan and metabolites in mouse urine**

336 Since triclosan has been observed to adsorb to plastic surfaces, sample handling was performed  
337 in glass vessels whenever possible (24). A stock solution of 1 mg/mL triclosan (Sigma) was  
338 prepared in methanol and a 100 µg/mL <sup>13</sup>C<sub>12</sub>-triclosan (99%) internal standard in MTBE was  
339 purchased from Cambridge Isotope Laboratories (Andover, MA). A dilution series of 1,000, 200,  
340 40, 8, 1.6, and 0.32 ng/mL triclosan was prepared in pooled, untreated mouse urine and spiked  
341 with 100 ng/mL <sup>13</sup>C<sub>12</sub>-triclosan internal standard. Samples were diluted 1:1 in methanol, spun  
342 down at 20,000×g for 10 minutes, and filtered through 0.45 µm 13 mm diameter PVDF syringe  
343 filters (Millipore). Finally, cleaned samples were diluted 1:1 in HPLC-grade water (Sigma).

344

345 Using a Shimadzu UFLC (Kyoto, Japan), 10 µL of each sample was injected onto a fused core  
346 phenyl-hexyl column (100 mm × 2 mm × 2.7 µm) with a 0.4 mL/min flow rate (Ascentis  
347 Express, Supelco). Triclosan was eluted from the column as follows: Solvent A (0.1% formic  
348 acid) and Solvent B (90% acetonitrile with 0.1% formic acid) were held constant at 80% and  
349 20%, respectively, for 0.1 minutes. Solvent B was increased to 98% by 5 minutes, held at 98%  
350 for 1 minutes, and then reduced again to 20% in 0.1 minutes. The column was equilibrated in  
351 20% Solvent B for 3 minutes between runs.

352 Triclosan was detected using an AB Sciex API 4000 QTrap mass spectrometer (AB Sciex, Foster  
353 City, CA) running in negative ion electrospray ionization mode (ESI) using a Turbo V ESI ion  
354 source. Triclosan was detected using the instrument settings listed in Supplementary Data Table  
355 1. A precursor ion scan was performed for the 35 m/z product ion to determine the mass  
356 spectrum of triclosan,  $^{13}\text{C}_{12}$ -triclosan, and any potential metabolites (Fig. S4a). Because triclosan  
357 contains three chlorine atoms, its mass spectrum includes prominent isotope peaks (M+2, M+4)  
358 corresponding to the natural abundance of  $^{37}\text{Cl}$  (Fig. S4b). To improve sensitivity, product ions  
359 from the two most abundant isotopologues were detected and added together prior to peak  
360 integration. Peaks for triclosan and internal standard were integrated with Analyst software (AB  
361 Sciex) and normalized. Normalized peak areas varied linearly with triclosan concentration above  
362 1.6 ng/mL.

363

364 Pooled urines from 3 to 4 mice were spiked with 100 ng/mL internal standard and cleaned as  
365 described above. Samples were analyzed by LC-MS/MS and triclosan was quantified using the  
366 standard curve (Fig. S4e).

367

### 368 **Statistical analysis**

369 Values for the *in vitro* data are expressed as the mean  $\pm$  standard error of the mean from n=3  
370 replicates. *In vitro* data was analyzed using a two-tailed Student's t-test with statistical  
371 significance determined when  $p < .05$ . For the mouse data, the Mann-Whitney U test was used to  
372 test for statistical significance. Values represent means  $\pm$  SEM derived from at least 3  
373 independent experiments. \*,  $P < 0.05$ ; \*\*,  $P < 0.005$ ; \*\*\*,  $P < 0.0005$ ; \*\*\*\*,  $P < 0.00005$ ; ns,  
374 difference not significant.



375 **Acknowledgements**

376 This work was supported by National Institutes of Health grants R01-GM64671 and R35-  
377 GM127331 to P.A.L. and R01-DK051406, R01-AI108749-01, and P50-DK0645400 grants to  
378 A.L.F-M and S.J.H. C.S.W was supported in part by an Arnold O. Beckman Postdoctoral  
379 Fellowship. J.I.R. and J.P.H. were supported by National Institutes of Health grant  
380 RO1DK111930. The authors thank Dr. Robyn Klein and members of the Levin, Hultgren, and  
381 Zaher groups for insightful suggestions and critical comments on the manuscript.

382

383 **Author Contributions**

384 CSW, PAL, ALFM, SJH, JIR and JPH designed the research studies. CSW performed the *in*  
385 *vitro* assays. ALFM and AJLL performed the animal experiments and acquired data. JIR and  
386 JPH performed triclosan detection and quantification experiments and acquired data. CSW  
387 ALFM, JIR, and PAL analyzed data. CSW, ALFM, and JIR prepared the figures. CSW, PAL,  
388 and ALFM wrote the manuscript. CSW, PAL, ALFM, SJH, JIR and JPH reviewed and edited the  
389 manuscript.

390

391

## 392 References

- 393 1. **Food and Drug Administration, HHS.** 2016. Safety and Effectiveness of Consumer  
394 Antiseptics; Topical Antimicrobial Drug Products for Over-the-Counter Human Use. Final  
395 rule. Fed Regist **81**:61106–61130.
- 396 2. **McEwen SA, Fedorka-Cray PJ.** 2002. Antimicrobial use and resistance in animals. Clin  
397 Infect Dis **34 Suppl 3**:S93–S106.
- 398 3. **Yazdankhah SP, Scheie AA, Høiby EA, Lunestad B-T, Heir E, Fotland TØ,**  
399 **Naterstad K, Kruse H.** 2006. Triclosan and antimicrobial resistance in bacteria: an  
400 overview. Microb Drug Resist **12**:83–90.
- 401 4. **McMurry LM, Oethinger M, Levy SB.** 1998. Triclosan targets lipid synthesis. Nature  
402 **394**:531–532.
- 403 5. **Maiden MM, Hunt AMA, Zachos MP, Gibson JA, Hurwitz ME, Mulks MH, Waters**  
404 **CM.** 2018. Triclosan Is an Aminoglycoside Adjuvant for Eradication of *Pseudomonas*  
405 *aeruginosa* Biofilms. Antimicrobial Agents and Chemotherapy **62**:e00146–18.
- 406 6. **Drury B, Scott J, Rosi-Marshall EJ, Kelly JJ.** 2013. Triclosan exposure increases  
407 triclosan resistance and influences taxonomic composition of benthic bacterial  
408 communities. Environ Sci Technol **47**:8923–8930.
- 409 7. **Singer H, Müller S, Tixier C, Pillonel L.** 2002. Triclosan: occurrence and fate of a  
410 widely used biocide in the aquatic environment: field measurements in wastewater  
411 treatment plants, surface waters, and lake sediments. Environ Sci Technol **36**:4998–5004.
- 412 8. **Calafat AM, Ye X, Wong L-Y, Reidy JA, Needham LL.** 2008. Urinary concentrations  
413 of triclosan in the U.S. population: 2003–2004. Environ Health Perspect **116**:303–307.
- 414 9. **MacIsaac JK, Gerona RR, Blanc PD, Apatira L, Friesen MW, Coppolino M, Janssen**  
415 **S.** 2014. Health care worker exposures to the antibacterial agent triclosan. J Occup  
416 Environ Med **56**:834–839.
- 417 10. **Balaban NQ, Merrin J, Chait R, Kowalik L, Leibler S.** 2004. Bacterial persistence as a  
418 phenotypic switch. Science **305**:1622–1625.
- 419 11. **Lewis K.** 2010. Persister cells. Annu Rev Microbiol **64**:357–372.
- 420 12. **Mulcahy LR, Burns JL, Lory S, Lewis K.** 2010. Emergence of *Pseudomonas aeruginosa*  
421 strains producing high levels of persister cells in patients with cystic fibrosis. J Bacteriol  
422 **192**:6191–6199.
- 423 13. **Proctor RA, van Langevelde P, Kristjansson M, Maslow JN, Arbeit RD.** 1995.  
424 Persistent and Relapsing Infections Associated with Small-Colony Variants of  
425 *Staphylococcus aureus*. CLIN INFECT DIS **20**:95–102.

- 426 14. **Høiby N, Bjarnsholt T, Givskov M, Molin S, Ciofu O.** 2010. Antibiotic resistance of  
427 bacterial biofilms. *Int J Antimicrob Agents* **35**:322–332.
- 428 15. **Seyfzadeh M, Keener J, Nomura M.** 1993. spoT-dependent accumulation of guanosine  
429 tetraphosphate in response to fatty acid starvation in *Escherichia coli*. *P Natl Acad Sci*  
430 *USA* **90**:11004–11008.
- 431 16. **Harms A, Fino C, Sørensen MA, Semsey S, Gerdes K.** 2017. Prophages and Growth  
432 Dynamics Confound Experimental Results with Antibiotic-Tolerant Persister Cells. *MBio*  
433 **8**:e01964–17.
- 434 17. **Korch SB, Henderson TA, Hill TM.** 2003. Characterization of the hipA7 allele of  
435 *Escherichia coli* and evidence that high persistence is governed by (p)ppGpp synthesis.  
436 *Mol Microbiol* **50**:1199–1213.
- 437 18. **Viducic D, Ono T, Murakami K, Susilowati H, Kayama S, Hirota K, Miyake Y.** 2006.  
438 Functional analysis of spoT, relA and dksA genes on quinolone tolerance in *Pseudomonas*  
439 *aeruginosa* under nongrowing condition. *Microbiol Immunol* **50**:349–357.
- 440 19. **Battesti A, Bouveret E.** 2006. Acyl carrier protein/SpoT interaction, the switch linking  
441 SpoT-dependent stress response to fatty acid metabolism. *Mol Microbiol* **62**:1048–1063.
- 442 20. **Muto A, Kimura A, Osawa S.** 1975. Effects of some antibiotics on the stringent control  
443 of RNA synthesis in *Escherichia coli*. *Mol Gen Genet* **139**:321–327.
- 444 21. **Brauner A, Fridman O, Gefen O, Balaban NQ.** 2016. Distinguishing between  
445 resistance, tolerance and persistence to antibiotic treatment. *Nat Rev Microbiol* **14**:320–  
446 330.
- 447 22. **Harding GK, Ronald AR.** 1994. The management of urinary infections: what have we  
448 learned in the past decade? *Int J Antimicrob Agents* **4**:83–88.
- 449 23. **Flores-Mireles AL, Walker JN, Caparon M, Hultgren SJ.** 2015. Urinary tract  
450 infections: epidemiology, mechanisms of infection and treatment options. *Nat Rev*  
451 *Microbiol* **13**:269–284.
- 452 24. **Provencher G, Bérubé R, Dumas P, Bienvenu J-F, Gaudreau E, Bélanger P, Ayotte**  
453 **P.** 2014. Determination of bisphenol A, triclosan and their metabolites in human urine  
454 using isotope-dilution liquid chromatography-tandem mass spectrometry. *J Chromatogr A*  
455 **1348**:97–104.
- 456 25. **Amato SM, Orman MA, Brynildsen MP.** 2013. Metabolic control of persister formation  
457 in *Escherichia coli*. *Mol Cell* **50**:475–487.
- 458 26. **Amato SM, Brynildsen MP.** 2015. Persister Heterogeneity Arising from a Single  
459 Metabolic Stress. *Curr Biol* **25**:2090–2098.
- 460 27. **Durfee T, Hansen A-M, Zhi H, Blattner FR, Jin DJ.** 2008. Transcription profiling of

- 461 the stringent response in *Escherichia coli*. *J Bacteriol* **190**:1084–1096.
- 462 28. **Schreiber G, Ron EZ, Glaser G.** 1995. ppGpp-mediated regulation of DNA replication  
463 and cell division in *Escherichia coli*. *Curr Microbiol* **30**:27–32.
- 464 29. **Ocampo PS, Lázár V, Papp B, Arnoldini M, Abel zur Wiesch P, Busa-Fekete R,**  
465 **Fekete G, Pál C, Ackermann M, Bonhoeffer S.** 2014. Antagonism between  
466 bacteriostatic and bactericidal antibiotics is prevalent. *Antimicrobial Agents and*  
467 *Chemotherapy*, 2nd ed. **58**:4573–4582.
- 468 30. **McNamara PJ, LaPara TM, Novak PJ.** 2014. The impacts of triclosan on anaerobic  
469 community structures, function, and antimicrobial resistance. *Environ Sci Technol*  
470 **48**:7393–7400.
- 471 31. **Lyman FL, Furia T.** 1969. Toxicology of 2, 4, 4'-trichloro-2'-hydroxy-diphenyl ether.  
472 *IMS Ind Med Surg* **38**:64–71.
- 473 32. **Karatzas KAG, Webber MA, Jorgensen F, Woodward MJ, Piddock LJV, Humphrey**  
474 **TJ.** 2007. Prolonged treatment of *Salmonella enterica* serovar Typhimurium with  
475 commercial disinfectants selects for multiple antibiotic resistance, increased efflux and  
476 reduced invasiveness. *J Antimicrob Chemother* **60**:947–955.
- 477 33. **Cavanagh J-AE, Trought K, Mitchell C, Northcott G, Tremblay LA.** 2018.  
478 Assessment of endocrine disruption and oxidative potential of bisphenol-A, triclosan,  
479 nonylphenol, diethylhexyl phthalate, galaxolide, and carbamazepine, common  
480 contaminants of municipal biosolids. *Toxicol In Vitro* **48**:342–349.
- 481 34. **Louis GW, Hallinger DR, Braxton MJ, Kamel A, Stoker TE.** 2017. Effects of chronic  
482 exposure to triclosan on reproductive and thyroid endpoints in the adult Wistar female rat.  
483 *J Toxicol Environ Health Part A* **80**:236–249.
- 484 35. **Foxman B, Brown P.** 2003. Epidemiology of urinary tract infections: transmission and  
485 risk factors, incidence, and costs. *Infect Dis Clin North Am* **17**:227–241.
- 486 36. **Mulvey MA, Schilling JD, Hultgren SJ.** 2001. Establishment of a persistent *Escherichia*  
487 *coli* reservoir during the acute phase of a bladder infection. *Infect Immun* **69**:4572–4579.
- 488 37. **Hung C-S, Dodson KW, Hultgren SJ.** 2009. A murine model of urinary tract infection.  
489 *Nat Protoc* **4**:1230–1243.

490  
491  
492  
493  
494  
495  
496  
497

498 **Figures**  
499

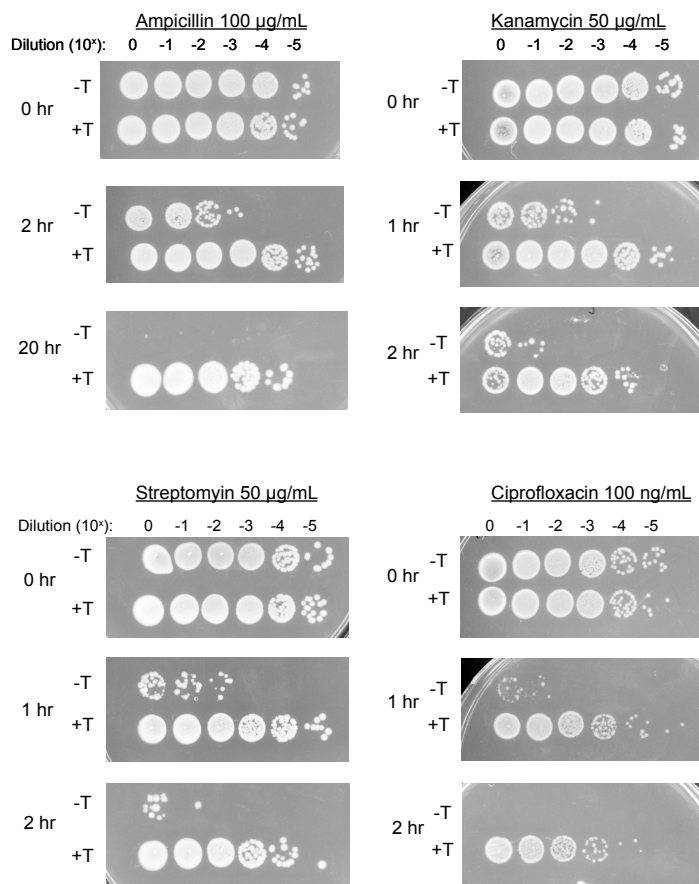

500

501 **Figure 1: Triclosan induces tolerance to multiple antibiotics.** *E. coli* (MG1655) were cultured  
502 to OD<sub>600</sub> = 0.2, split and cultured for an additional 30 minutes with (+T) or without 200 ng/ml  
503 triclosan (-T). Indicated bactericidal antibiotics were then added and cells cultured for an  
504 additional 2 to 20 hours prior to dilution plating. Each experiment was replicated three  
505 independent times with only representative data shown.

506

507

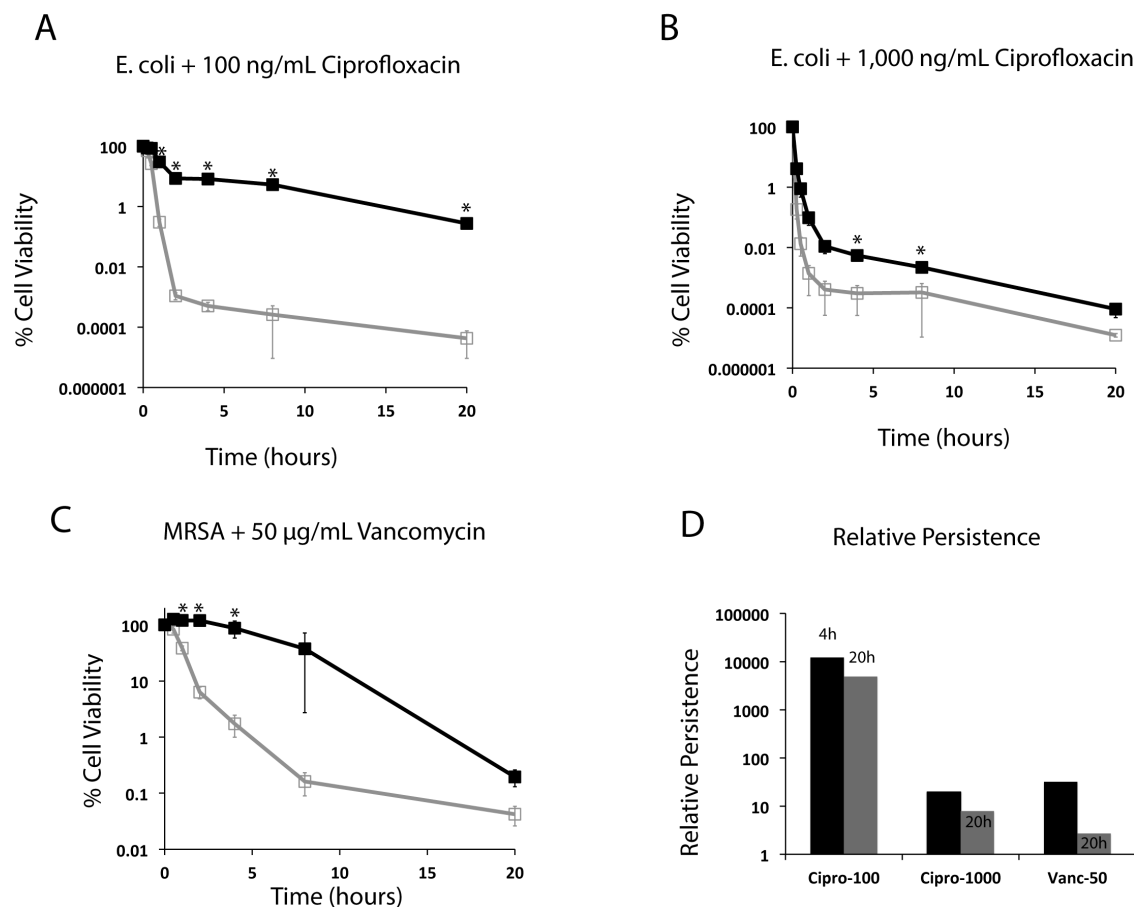

508

509

510 **Figure 2: Kinetic analysis of triclosan-induced persistence.** *E. coli* (MG1655) and MRSA  
511 (FPR3757) cells were cultured to OD-600 = 0.2, split and cultured for an additional 30 minutes  
512 with (black line, closed squares) or without triclosan (grey line, open squares). At t=0, 100  
513 ng/mL (A) or 1,000 ng/mL ciprofloxacin (B) was added to *E. coli* cultures and 50 ng/ml  
514 vancomycin was added to MRSA cultures (C). Relative persistence in the presence of triclosan  
515 (CFU+T/CFU-T) was calculated from the 4- and 20-hour time points (D). Values are the mean of  
516 three independent biological replicates with error bars representing the standard error of the  
517 mean. Asterisks represent significant difference between the triclosan treated and non-treated  
518 using a Student's two-tailed t-test with \* = p< 0.05.

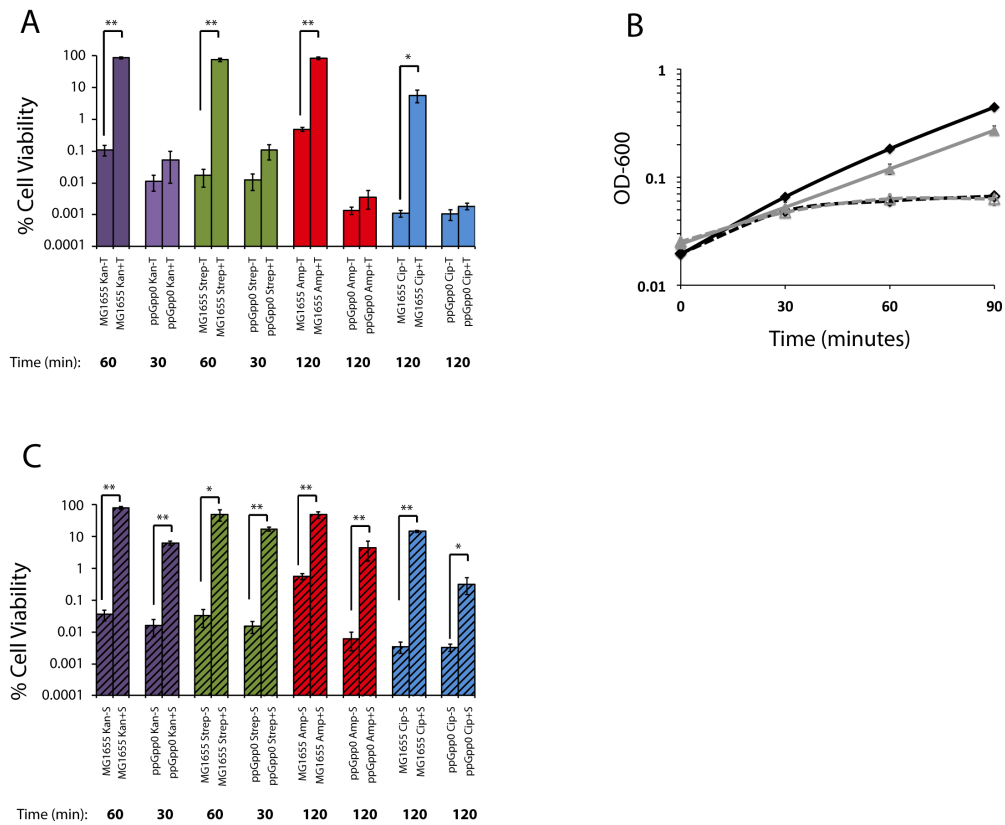

519

520 **Figure 3. ppGpp is needed for triclosan induced tolerance.** Cell viability of MG1655 and  
 521 ppGpp0 *E. coli* with (+T) or without (-T) pretreatment with triclosan after challenge with  
 522 antibiotic (A). Growth curves of MG1655 (black curve) or ppGpp0 (gray curve) in LB with  
 523 (dashed lines) or without (solid lines) triclosan (B). Cell viability of MG1655 and ppGpp0 *E. coli*  
 524 with (+T) or without (-T) pretreatment with spectinomycin after challenge with antibiotic (C).  
 525 Values are the mean of three independent biological replicates with error bars representing the

526 standard error of the mean. Asterisks represent significant difference between the triclosan  
527 treated and non-treated using a Student's two-tailed t-test with \* =  $p < 0.05$  and \*\* =  $p < .001$ .

528

529

530

531

532

533

534

535

536

537

538

539

540

541

542

543

544

545



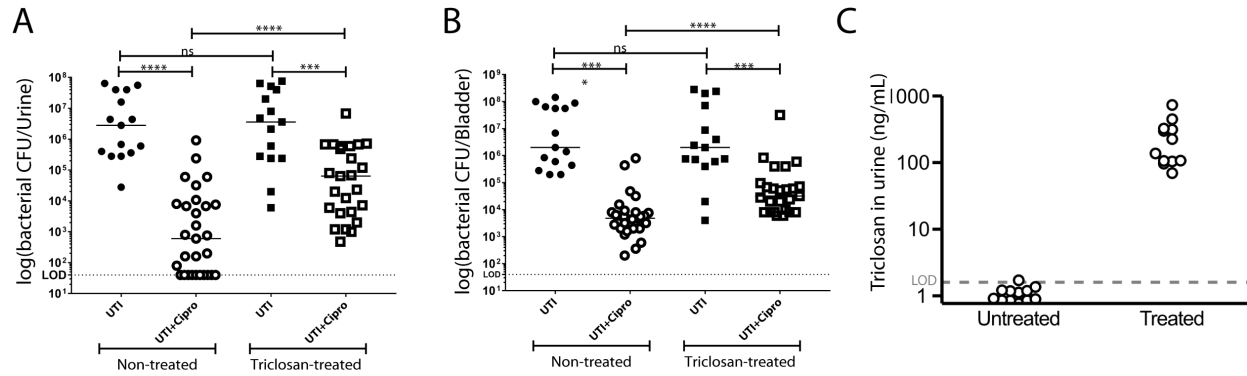

546

547 **Figure 4: Triclosan reduces ciprofloxacin efficacy up to 100-fold in a mouse UTI model.**

548 For each round of the experiment, 15 mice were given water containing triclosan (1,000

549 ng/mL) for 21 days, and 15 control mice received plain water. At 21 days, all mice were

550 infected with *E. coli* UTI89 (~5 x 10<sup>7</sup> CFU). 24 hours post-infection, 10 mice from each

551 group were given 25 mg/kg of ciprofloxacin intraperitoneally. 48 hours post infection, urine

552 (A) was taken and mice were sacrificed and bladders (B) were harvested. To compare the

553 mice groups, Mann-Whitney U test was used, p < 0.05 was considered statistically significant:

554 \*, p < 0.05; \*\*, p < 0.005; \*\*\*, p < 0.0005; ns, values were not statistically different. The

555 horizontal bar represents the median value. The horizontal broken line represents the limit of

556 detection (LOD) of viable bacteria. Data are from 3 independent experiments. (C) Free

557 triclosan levels measured by LC-MS/MS of triclosan in untreated and treated mouse urine.

558 (45 mice were untreated and 45 mice were treated, these mice were divided in three

559 independent experiments. Urine from 3-4 mice was pooled for triclosan analysis). The

560 horizontal broken line represents the limit of detection (LOD) of triclosan.

561

562

563

564

565 **Supplementary Data**

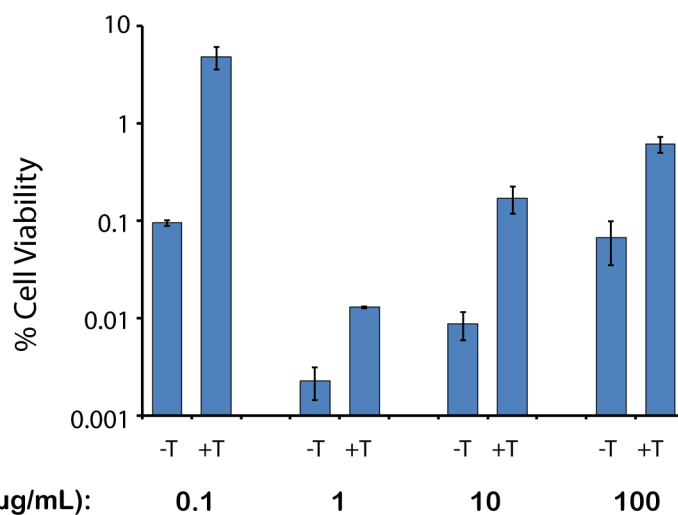

566

Cipro (µg/mL): 0.1 1 10 100

567

568 **Supplementary Data Figure 1. Triclosan protects at high concentrations of ciprofloxacin.**

569 MG1655 cells were grown to OD-600 = 0.1 before triclosan was added for a final concentration  
570 of 200 ng/mL for 30 minutes. Ciprofloxacin was added at the labeled concentration.

571 Ciprofloxacin was washed off, and cell viability was determined. Values are shown as averages

572 of three replicates with error bars showing the standard error of the mean.

573

574

575

576

577

578

579

580

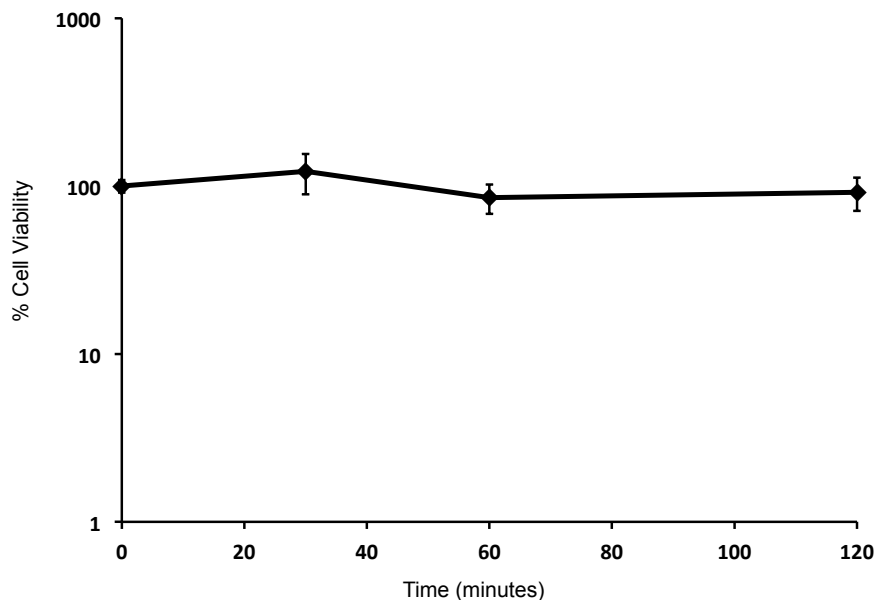

581

582 **Supplementary Data Figure 2. Triclosan is not bactericidal to the ppGpp0 cells.** ppGpp0

583 cells were grown to OD-600 = 0.2 before triclosan was added for a final concentration of 200

584 ng/mL. Cells were plated at each time pointed and colony-forming units were quantified. Each

585 point represents the average of three biological replicates with the error bars representing the

586 standard error of the mean.

587

588

589

590

591

592

593

594

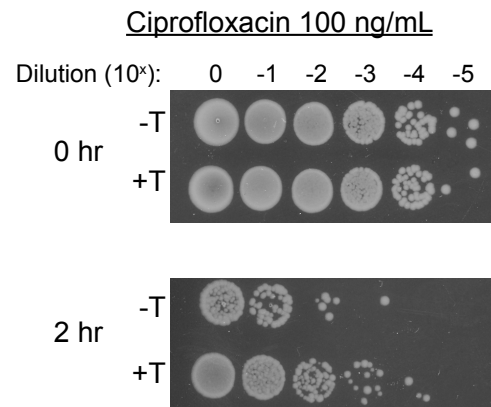

595

596 **Supplementary Data Figure 3. Triclosan induces ciprofloxacin tolerance in the**

597 **uropathogenic *E. coli* UTI89.** UTI89 cells were grown up to OD-600 = 0.2, split and cultured

598 for an additional 30 minutes with (+T) or without 200ng/ml triclosan (-T). Ciprofloxacin was

599 added to obtain a final concentration of 100 ng/mL. Cells were dot-plated at the 0- and 2-hour

600 time points. The plating efficiency was repeated three independent times with a representative

601 image shown.

602

603

604

605

606

607

608

609

610

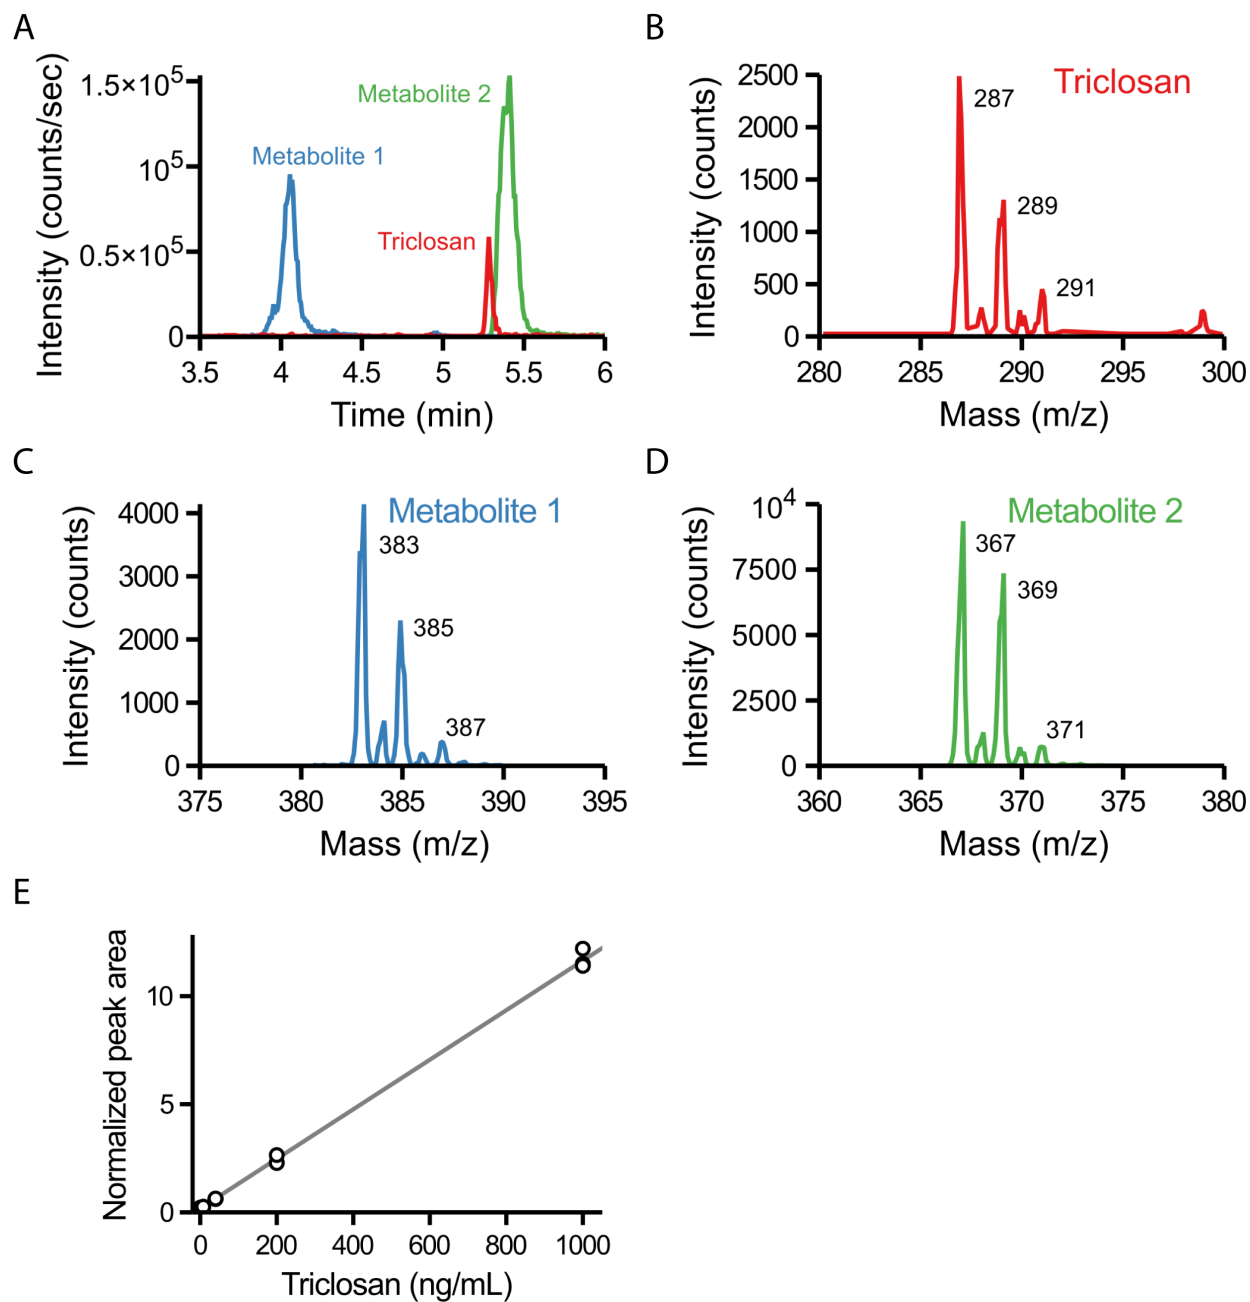

611

612 **Supplementary Data Figure 4. Measurement of free and metabolized triclosan in triclosan-**

613 **treated mouse urine.** Chromatogram of a representative LC-MS/MS experiment showing the

614 elution profile of metabolite 1 (blue), triclosan (red) and metabolite 2 (green) (A). Mass spectra

615 of triclosan, metabolite 1, and metabolite 2, respectively, measured using precursor ion scans for

616 the chloride product ion (35 m/z) (B, C, and D). Triclosan peak area detected by LC-MS/MS

617 varies linearly with concentration down to 1.6 ng/mL (E).

618

619

620

621

622

623

624

625

626

627

628

629

630

631

632

633

634

635

636

637

638

| <b>Instrument Settings</b>               |             |             |
|------------------------------------------|-------------|-------------|
| Ion Spray Voltage                        | -4.5 kV     |             |
| Heater Temperature                       | 500 °C      |             |
| Nebulizer Gas                            | 40          |             |
| Auxiliary Gas                            | 40          |             |
| Declustering Potential                   | -10 V       |             |
| Collision Energy                         | -40 V       |             |
| <b>Ions Detected (m/z)</b>               |             |             |
| Triclosan                                | 286.8 → 35  | 288.7 → 35  |
| <sup>13</sup> C <sub>12</sub> -Triclosan | 298.84 → 35 | 300.74 → 35 |
| Metabolite 1                             | 382.8 → 35  | 384.8 → 35  |
| Metabolite 2                             | 366.7 → 35  | 368.8 → 35  |

639

640 **Supplementary Data Table 1. MS/MS settings for triclosan detection**

641
